# Supplementary material for: Aerobic Degradation Characteristics of Decabromodiphenyl ether through Rhodococcus ruber TAW-CT127 and Its Preliminary Genome Analysis
Source: MDPI journal article supplement (doi:10.3390/microorganisms10071441), 2022-07-17
Supplement: s1 [file s1]

Table S2. COG analysis of strain TAW-CT127

| Categories   | Function annotation                                           | TAW-CT127   |               |
|--------------|---------------------------------------------------------------|-------------|---------------|
|              |                                                               | orf number  | percentage(%) |
| A            | RNA processing and modification                               | 1           | 0.04          |
| B            | Chromatin structure and dynamics                              | 1           | 0.04          |
| C            | Energy production and conversion                              | 291         | 10.22         |
| D            | Cell cycle control, cell division, chromosome partitioning    | 21          | 0.74          |
| E            | Amino acid transport and metabolism                           | 250         | 8.78          |
| F            | Nucleotide transport and metabolism                           | 66          | 2.32          |
| G            | Carbohydrate transport and metabolism                         | 166         | 5.83          |
| H            | Coenzyme transport and metabolism                             | 94          | 3.30          |
| I            | Lipid transport and metabolism                                | 334         | 11.74         |
| J            | Translation, ribosomal structure and biogenesis               | 146         | 5.13          |
| K            | Transcription                                                 | 218         | 7.66          |
| L            | Replication, recombination and repair                         | 120         | 4.22          |
| M            | Cell wall/membrane/envelope biogenesis                        | 102         | 3.58          |
| N            | Cell motility                                                 | 0           | 0.00          |
| O            | Posttranslational modification, protein turnover, chaperones  | 91          | 3.20          |
| P            | Inorganic ion transport and metabolism                        | 176         | 6.18          |
| Q            | Secondary metabolites biosynthesis, transport and catabolism  | 184         | 6.47          |
| R            | General function predictiononly                               | 235         | 8.26          |
| S            | Function unknown                                              | 198         | 6.96          |
| T            | Signal transduction mechanisms                                | 92          | 3.23          |
| U            | Intracellular trafficking, secretion, and vesicular transport | 18          | 0.63          |
| V            | Defense mechanisms                                            | 42          | 1.48          |
| W            | Extracellular structures                                      | 0           | 0.00          |
| Y            | Nuclear structure                                             | 0           | 0.00          |
| Z            | Cytoskeleton                                                  | 0           | 0.00          |
| <b>Total</b> |                                                               | <b>2846</b> | <b>100</b>    |
