# Supplementary material for: Aerobic Degradation Characteristics of Decabromodiphenyl ether through Rhodococcus ruber TAW-CT127 and Its Preliminary Genome Analysis
Source: MDPI journal article supplement (doi:10.3390/microorganisms10071441), 2022-07-17
Supplement: s1 [file s1]

Table S1. 16S rRNA sequence of strain TAW-CT127

| 16S rRNA sequence of strain TAW-CT127                                                                                                                                                                                                                                                                                                                                                                                                                                                                                                                                                                                                                                                                                                                                                                                                                                                                                                                                                                                                                                                                                                                                                                                                                                                                                                                                                                                                                                                                                                                                                                                                     |
|-------------------------------------------------------------------------------------------------------------------------------------------------------------------------------------------------------------------------------------------------------------------------------------------------------------------------------------------------------------------------------------------------------------------------------------------------------------------------------------------------------------------------------------------------------------------------------------------------------------------------------------------------------------------------------------------------------------------------------------------------------------------------------------------------------------------------------------------------------------------------------------------------------------------------------------------------------------------------------------------------------------------------------------------------------------------------------------------------------------------------------------------------------------------------------------------------------------------------------------------------------------------------------------------------------------------------------------------------------------------------------------------------------------------------------------------------------------------------------------------------------------------------------------------------------------------------------------------------------------------------------------------|
| TCCTGGCTCAGGACGAACGCTGGCGGCGTGCTTAACACATGCAAGTCGAACGATG<br>AAGCCCAGCTTGCTGGGTGGATTAGTGGCGAACGGGTGAGTAACACGTGGGTGAT<br>CTGCCCTGCACTTCGGGATAAGCCTGGGAACTGGGTCTAATACCGGATAGGACCT<br>CGGGATGCATGTTCCGGGGTGGAAAGGTTTTCCGGTGCAGGATGGGCCCCGCGGCCT<br>ATCAGCTTGTTGGTGGGGTAACGGGCCACCAAGGCGACGACGGGTAGCCGGCCTG<br>AGAGGGCGACCGGCCACACTGGGACTGAGACACGGCCCAGACTCCTACGGGAGG<br>CAGCAGTGGGGAATATTGCACAATGGGCGCAAGCCTGATGCAGCGACGCCGCGTG<br>AGGGATGACGGCCTTCGGGTGTAAACCTCTTTCAGTACCGACGAAGCGCAAGTG<br>ACGGTAGGTACAGAAGAAGCACCGGCCAACTACGTGCCAGCAGCCGCGGTAATA<br>CGTAGGGTGCGAGCGTTGTCCGGAATTACTGGGCGTAAAGAGCTCGTAGGCGGTTT<br>GTCGCGTCGTCTGTGAAAACCCGCAGCTCAACTGCGGGCTTGCAGGCGATACGGG<br>CAGACTTGAGTACTGCAGGGGAGACTGGAATTCCTGGTGTAGCGGTGAAATGCGC<br>AGATATCAGGAGGAACACCGGTGGCGAAGGCGGGTCTCTGGGCAGTAACTGACGC<br>TGAGGAGCGAAAGCGTGGGTAGCGAACAGGATTAGATACCCTGGTAGTCCACGCC<br>GTAAACGGTGCGCGCTAGGTGTGGGTTTCCTTCCACGGGATCCGTGCCGTAGCTAA<br>CGCATTAAAGCGCCCCGCCTGGGGAGTACGGCCGCAAGGCTAAAACTCAAAGGAAT<br>TGACGGGGGGCCCCGCACAAGCGGCGGAGCATGTGGATTAATTCGATGCAACGCGAA<br>GAACCTTACCTGGGTTTGACATACACCGGACCGCCCCAGAGATGGGGTTTCCCTTG<br>TGGTCGGTGTACAGGTGGTGCATGGCTGTCTCAGCTCGTGTCTGAGATGTTGGGT<br>TAAGTCCCGCAACGAGCGCAACCCTTGTCCTGTGTTGCCAGCACGTAATGGTGGGG<br>ACTCGCAGGAGACTGCCGGGGTCAACTCGGAGGAAGGTGGGGACGACGTCAAGTC<br>ATCATGCCCCTTATGTCCAGGGCTTCACACATGCTACAATGGCCGGTACAGAGGGC<br>TGCGATACCGCGAGGTGGAGCGAATCCCTTAAAGCCGGTCTCAGTTCGGATCGGG<br>GTCTGCAACTCGACCCCGTGAAGTCCGAGTCGCTAGTAATCGCAGATCAGCAACG<br>CTGCGGTGAATACGTTCCCGGGCCTTGTAACACCGCCCGTCACGTCATGAAAGTC<br>GGTAACACCCGAAGCCGGTGGCCTAACCCCTCGTGGGAGGGAGCCGTCGAAGGTG<br>GGATCGGCGATTGGGACGAAGTCGTAACAAGGTAGC |
